# Supplementary material for: Transient Increases in Inflammation and Proapoptotic Potential Are Associated with the HESN Phenotype Observed in a Subgroup of Kenyan Female Sex Workers
Source: MDPI journal article supplement (doi:10.3390/v14030471), 2022-02-25
Supplement: s1 [file s1]

**Supplementary Figures and Tables:**

**Supplementary Table S1: Validated ISG Primer Pairs**

| Gene         | Forward Primer Sequence 5'-3'                          | Reverse Primer Sequence 5'-3'              |
|--------------|--------------------------------------------------------|--------------------------------------------|
| 18s rRNA     | Hs99999901_s1 (18S) FAM-MGB/S, ThermoFisher Scientific |                                            |
| 5LO          | CACATGTTCCAGTCTTCTTGG<br>A                             | ATGACCCGCTCAGAAATAGTGT                     |
| ACTB         | ACT GGG ACG ACA TGG AGA<br>AAA                         | GCC ACA CGC AGC TCA TTG TA                 |
| ANKRD1       | GACCTCAACGCCAAAGACAG<br>A                              | GGTTCAGTCTCACCGCATCA                       |
| APOBEC3F     | GCA CCG CAC GCT AAA GGA                                | TTT TAA AGT GGA AGT AGA ATA TGT<br>GTG GAT |
| ATM          | CAGCAGCTGTTACCTGTTTG                                   | TAGATAGGCCAGCATTGGAT                       |
| BAX          | GATGCGTCCACCAAGAAGCT                                   | CGGCCCCAGTTGAAGTTG                         |
| BCL2         | CATGTGTGTGGAGAGCGTCA<br>A                              | GCCGGTTCAGGTACTCAGTCA                      |
| BclXL/BCL2L1 | GGTCGCATTGTGGCCTTT                                     | TCCTTGCTACGCTTTCCACG                       |
| BRCA1        | CAG AGG ACA ATG GCT TCC<br>ATG                         | CTA CAC TGT CCA ACA CCC ACT CTC            |
| C5           | GCGAGCTGCACGGATTAGTT                                   | TGCGACGACACAACATTCAGT                      |
| CAR          | AGCCTTCAGGTGCGAGATGTT<br>ACG                           | TACGACAGCAAAAGATGATAAGAC                   |
| CASP8        | GTCTGTACCTTTCTGGCGGA                                   | TCCAGTTTGCATTTGGAGATT                      |
| CASP9        | GTTTGAGGACCTTCGACCAGC<br>T                             | CAACGTACCAGGAGCCACTCTT                     |
| CCL5/RANTES  | TAC ACC AGT GGC AAG TGC<br>TC                          | GAA GCC TCC CAA GCT AGG AC                 |
| CDC25A       | CAAACCTTGACAACCGATGC                                   | AACTGACCGAGTGCTGGAG                        |
| CDC25B       | GGG CAA GTT CAG CAA CAT<br>CGT GGA                     | GTA GCC GCC TTT CAG GAT ATA CAT<br>C       |
| CDK1         | TGGATCTGAAGAAATACTTG<br>GATTCTA                        | CAATCCCCTGTAGGATTGG                        |
| CDK2         | Tn GCT GAG ATG GTG ACT CG                              | GTA ACT CCT GGC CAe ACC AC                 |
| CDK4         | TCC cn GAT CTG AGAATG GC                               | GAT CAC GGG CCT TGT ACA CT                 |
| CDK4A        | AAATCTTTGACCTGATTGGG                                   | CCTTATGTAGATAAGAGTGCTG                     |
| CDK7         | ATG GCT CTG GAC GTG AAG<br>TC                          | CIT AAT GGC GAC AAT ITG GIT G              |
| CDK6         | CTG CAG GGA AAG AAA AGT<br>GC                          | CTC GAA GCG AAG TCC TCA AC                 |

|                |                                                                         |                                      |
|----------------|-------------------------------------------------------------------------|--------------------------------------|
| CDKN2A/p16/p14 | CCCTCGTGCTGATGCTACTG                                                    | CATCATGACCTGGTCTTCTAGGAA             |
| CIAP2          | TGT TGG GAA TCT GGA GAT<br>GA                                           | CGG ATG AAC TCC TGT CCT TT           |
| CXCL10/IP-10   | TTC CTG CAA GCC AAT TTT<br>GTC                                          | TCT TCT CAC CCT TCT TTT TCA TTG T    |
| DPP4/CD26      | PrimePCR™ Template for SYBR® Green Assay: DPP4, Human, Bio-Rad Canada   |                                      |
| E2F1           | CACAGATCCCAGCCAGTCTCT<br>A                                              | GAGAAGTCCTCCCGCACATG                 |
| EIF2AK2/PKR    | CGT TGC TTA TGA ATG GTC<br>TCA G                                        | AGG AAG GTC AAA TCT GGG TG           |
| FAS            | AAA GTG GCC CAT ITA ACA<br>GGC                                          | AAA GCA GGA CAA ITC CAT AGG TG       |
| FASL           | AAAGTGGCCCATTTAACAGG<br>C                                               | AAAGCAGGACAATTCCATAGGTG              |
| FCGR2B         | PrimePCR™ Template for SYBR® Green Assay: FCGR2B, Human, Bio-Rad Canada |                                      |
| FLAP-1/LRRFIP1 | gagagacttccgacaccctcaa                                                  | cacctccacttcactggctctt               |
| FLIP           | GTG GAG ACC CAC CTG CTC<br>A                                            | GGA CAC ATC AGA TIT ATC CAA ATC<br>C |
| GADD45         | TCA GCG CAC GAT CAC TGT C                                               | CCA GCA GGC ACA ACA CCA C            |
| GPT2           | TGAGCAATTCAGCCGAGAGA                                                    | GGTCTTCCGTCAGCTTTGCTT                |
| HDM2           | ACCCTGGTTAGACCAAAGCC                                                    | ACAATATGTTGTTGCTTCTCATCA             |
| IDO1           | AGA AGT GGG CTT TGC TCT<br>GC                                           | TGG CAA GAC CTT ACG GAC ATC TC       |
| IFI6/G1P3      | CCACCATGCGGCAGAAG                                                       | AAGTGAAGAGCAGCAGGTAGCA               |
| IFIH1/MDA5     | TCIGTCGAGCCAGAGCTGAT                                                    | ACTCCTGAACCACTGTGAGCAA               |
| IFIT1/ISG56    | CAA CCA AGC AAA TGT GAG<br>GA                                           | AGG GGA AGC AAA GAA AAT GG           |
| IFIT3/ISG60    | TCC ACA CCA AAC AAT GGC<br>TA                                           | TGT TGC TIT TCA GCA TCA GG           |
| IFNa1/13       | tagacaaattctgcaccgaac                                                   | agatggagtccicattcatc                 |
| IFNA2          | ggtagcaggaggaccttgatg                                                   | ggaggacagggatggtttcag                |
| IFNA4          | GAG GCC GAA GTI CAA GGT<br>TA                                           | TAA AGA AAA GGA CAG GGC CA           |
| IFNB1          | TTGTGCTTCTCCACTACAGC                                                    | CTGTAAGTCTGTTAATGAAG                 |
| IL-15          | AAC AGA AGC CAA CTG GGT<br>GAA TG                                       | CTC CAA GAG AAA GCA CTT CAT TGC      |
| IL-23 p19      | ACACATGGATCTAAGAGAAG<br>AGG                                             | CTATCAGGGAGCAGAGAAGG                 |
| IL-28          | CAGCTGCAGGTGAGGGA                                                       | GGTGGCCTCCAGAACCTT                   |
| IL-29          | GGACGCCTTGAAGAGTCAC<br>T                                                | AGAAGCCTCAGGTCCCAATTC                |

|              |                                                                      |                                           |
|--------------|----------------------------------------------------------------------|-------------------------------------------|
| IL-29        | GGACGCCTTGGAAGAGTCAC<br>T                                            | AGAAGCCTCAGGTCCCAATTC                     |
| IL-6         | GGA GAC TTG CCT GGT GAA<br>AA                                        | ATC TGA GGT GCC CAT GCT AC                |
| IL1B         | ATC GGC CTC TAT TTG AAG<br>ATA TGA CT                                | CCT CTA GGC TGG CTA TCT TTA TAC<br>ATA CT |
| IRF-1        | AAAAGGAGCCAGATCCCAAG<br>A                                            | CATCCGGTACACTCGCACAG                      |
| IRF-4        | AGCAGTTCTTGTGAGAGC                                                   | GTTCTACGTGAGCTGTGATG                      |
| IRF-5        | ATGCTGCCTCTGACCGA                                                    | GCCGAAGAGTTCCACCTG                        |
| IRF-7        | GAG CCC TTA CCT CCC CTG<br>TTA T                                     | CCA CTG CAG CCC CTC ATA G                 |
| IRF-9        | TGAGCCACAGGAAGTTACA                                                  | GAGCAGCAGTGAGTAGTCT                       |
| ISG15        | AGC TCC ATG TGG GTG TCA G                                            | GAA GGT CAG CCA GAA CAG GT                |
| ISG20        | AGATCCTGCAGCTCCTGAAA                                                 | TGTTCTGGATGCTCTTGTGC                      |
| LMP10        | TCTGGGCGCCGATACG                                                     | TGGATCTTCTCGCAGCTCTTG                     |
| LMP7         | TTACCTGCTTGGCACCATGTC                                                | AGCAGGCGCTCCAGTACT                        |
| MCL1         | CGTTGTCTCGAGTGATGATCC<br>A                                           | ATTCCTGATGCCACCTTCTA                      |
| MXA          | GGT GTC GAC ATA CCG GAA<br>GA                                        | CTC err GCA TGA GAG CAG TG                |
| MxB          | PrimePCR™ Template for SYBR® Green Assay: MX2, Human, Bio-Rad Canada |                                           |
| MYD88        | GAGCTGGCGGGCATCAC                                                    | TCGAAACGCTCAGGCATATG                      |
| OAS1         | CCT GGT TGT cn CCT CAG TCC                                           | GTG GAG AAC TCG CCC TCT n                 |
| OAS2         | TGA GAG CAA TGG GAA ATG<br>GG                                        | AGG TAT TCC TGG ATA AAC CAA CCC           |
| OASL         | GGA TCT CCC ACA CTC ACA<br>TCT                                       | CAC CAT CAG GAT TCT TCA CGA A             |
| P21cip1      | CCT CAT CCC GTG TIC TCC<br>TTI                                       | GTA CCA CCC AGC GGA CAA GT                |
| p53          | TCA ACA AGA TGT TIT GCC<br>AAC TG                                    | ATG TGC TGT GAC TGC TTG TAG ATG           |
| P8           | TCTATAGCCTGGCCCATTCT                                                 | TCTCTTGGTGCGACCTTTCC                      |
| RELA         | AGCGCATCCAGACCAACAA                                                  | TAGTCCCCACGCTGCTCTTC                      |
| PELI1        | TCAGGCTGCAAAGGCAATAA<br>G                                            | TCTGGGCCCCGAGACAAAGTA                     |
| PMAIP1/NOXA  | AGC TGG AAG TCG AGT GTG<br>CT                                        | TCC TGA GCA GAA GAG TIT GGA               |
| PML / TRIM19 | TGACCAGCATCTACTGCCG                                                  | AGCTCACTGTGGCTGCTGTC                      |
| PSME2        | AGCTTTCCAGACAACCATTTTC<br>C                                          | GGCCTTGCCACAGCAT                          |
| PTGS2/COX2   | GCTGGAACATGGAATTACCC                                                 | CTTCTGTACTGCGGGTGGA                       |

|                       |                                   |                                        |
|-----------------------|-----------------------------------|----------------------------------------|
|                       | A                                 |                                        |
| PUMA                  | CCTGGAGGGTCCTGTACAATC<br>T        | GCACCTAATTGGGCTCCATCT                  |
| RB1                   | ACCTCAAACAAGGAAGAGAA<br>ATGAG     | ACATCTGTGAGAGACAATGAATCCA              |
| RIGI/DDX58            | GCAGAGGCCCGCATGAC                 | TGTAGGTAGGGTCCAGGGTCTTC                |
| RNASEL                | GAC ACC TCT GCA TAA CGC<br>AGT    | GCG TGG CCC CAT TCT T                  |
| SOCS-1                | TTTTCGCCCTTAGCGTGAAG              | CATCCAGGTGAAAGCGGC                     |
| STAT1                 | CCT GCT GCG GTT CAG TGA           | TCC ACC CAT GTG AAT GTG ATG            |
| TAP1                  | TCCTGGTGGTCCTCTCCTCTCT<br>T       | GTGTTGTTATAGATCCCGTCACCC               |
| TNF/TNFA              | TCA ACC TCC TCT CTG CCA<br>TC     | CCT AAG CCC CCA ATT CTC TT             |
| TNFRSF10A/TRAIL<br>R1 | CTGATGAAATGGGTCAACAA              | AACTTTCCAGAGTCCACCAA                   |
| TNFSF10/TRAIL         | GAGCTGAAGCAGATGCAGGA<br>C         | TGACGGAGTTGCCACTTGACT                  |
| TREX1                 | GGT GCC TTC TGT GTG GAT<br>AGC    | CTT CCT TGG GCC GTG TTC TG             |
| TRIM11                | CTA CGA GGC TGG ACA TCT<br>CTC    | CCG GCA GAT AGT CAT CGG G              |
| TRIM25                | CGGGTCGTGCCTGAATGAG               | GCACCGTGTTCTTGTGCAG                    |
| TRIM32                | TGT CCC TTT TGC AGC AAG<br>ATT    | GAT CTT TAG CAC TGT CAG ATT GTC<br>TGT |
| TRIM5a                | CTGGGTTGATGTGACAGTGG              | ACACATTGCATCAGGTTGGA                   |
| Viperin/RSAD2         | CAC AAA GAA GTG TCC TGC<br>TTG GT | AAG CGC ATA TAT TTC ATC CAG AAT<br>AAG |
| XIAPRF                | GCT TGC AAG AGC TGG A TT<br>IT    | CAC TGG GCT TCC AAT CAG IT             |
| YLPM1/ZAP             | CCC GAG GGA ACT GTC GTT<br>TT     | GAT GGC CAG CAC CTT TCT GT             |
| ZFP36L2               | TGCGGGATCCAGAAACATG               | GCACAAGAAGTCGACATCGTAGA                |
| CX3CL1                | CCTGTAGCTTTGCTCATCCAC<br>TATC     | TCCAAGATGATTGCGCGTT                    |
